# Supplementary material for: IL-1 modulation preserves biomolecular, structural and functional integrity of the somatosensory cortex after fetal inflammation
Source: Research Square preprint supplement (doi:10.21203/rs.3.rs-7882525/v1), 2025-11-07
Supplement: Supplementary file 1 [file 08ea412d0c9bf4f16b085c4d.xlsx]

## Sheet: Sheet1
Supplementary Table 2. Differential expression analysis results between the LPS + Vehicle and LPS + IL-1Ra Groups.
Gene	log2FC	AveExpr	t	P.Value	adj.P.Val	B
ENSOARG00020030588	-0.610463	6.88865	-4.92685	3.07356e-05	0.160086	2.42868
ENSOARG00020038005	-0.600425	9.12106	-4.89746	3.33564e-05	0.160086	2.27707
TMEM59L	-0.693541	6.84384	-4.43628	0.000120035	0.165649	1.15836
GLO1	-0.589195	3.31023	-4.42843	0.000122668	0.165649	0.802054
ENSOARG00020035937	-0.649591	6.74983	-4.33219	0.000159993	0.165649	0.89566
MIA	0.906472	2.19577	4.31885	0.000165984	0.165649	-0.0653947
ENSOARG00020031627	-0.632247	6.55773	-4.18747	0.000238185	0.21782	0.534872
CYP39A1	-0.625782	4.28043	-4.10318	0.000300017	0.24388	0.298704
ENSOARG00020014513	-2.28352	-0.330676	-3.893	0.000531348	0.301375	-2.90343
ENSOARG00020031835	-0.818738	7.38099	-3.86188	0.000577968	0.301375	-0.330499
ELOVL1	-1.01245	4.39185	-3.85307	0.000591873	0.301375	-0.270669
ENSOARG00020035848	-0.684931	5.57894	-3.81628	0.000653579	0.318772	-0.34468
ENSOARG00020021581	0.75504	2.02944	3.79781	0.000686892	0.322459	-1.10169
ENSOARG00020039014	0.771152	2.77653	3.76488	0.000750431	0.322459	-0.763884
KCTD10	-0.58939	3.19419	-3.66245	0.00098695	0.343575	-0.860541
OLIG1	-0.640061	3.81583	-3.65924	0.000995437	0.343575	-0.773513
KIRREL1	0.734896	2.95517	3.61509	0.0011195	0.343575	-0.995197
THEMIS2	-1.15358	1.4089	-3.61056	0.00113307	0.343575	-1.79959
ENSOARG00020037893	1.35573	0.643694	3.5953	0.00117988	0.343575	-2.4505
ENSOARG00020037506	-1.25911	1.17907	-3.54716	0.00134026	0.363161	-2.00647
ENSOARG00020039350	1.57308	0.419254	3.5106	0.00147599	0.370444	-2.77815
ENSOARG00020036921	0.639927	2.22341	3.48867	0.00156365	0.376975	-1.51808
SLC17A7	0.747029	1.66134	3.48361	0.00158459	0.376975	-1.93963
INTS6L	0.862264	2.5082	3.47179	0.00163459	0.376975	-1.46109
ENSOARG00020039835	0.647503	3.64078	3.46778	0.00165188	0.376975	-1.18329
KAZN	-0.638567	2.98634	-3.41793	0.00188229	0.391816	-1.40327
TRH	1.60695	0.110499	3.35393	0.00222389	0.391816	-3.06895
ENSOARG00020035668	-0.589171	2.63844	-3.34792	0.0022589	0.391816	-1.62598
ENSOARG00020028413	0.680108	2.97564	3.34229	0.00229215	0.391816	-1.52695
ADCYAP1	0.611029	4.5506	3.32963	0.00236861	0.391816	-1.44808
CNNM2	0.916161	1.20116	3.32038	0.0024261	0.391816	-2.34811
ENSOARG00020006863	-1.03171	1.78757	-3.30534	0.00252238	0.391816	-1.97633
CPQ	0.61908	4.78168	3.26491	0.00279975	0.392659	-1.59891
ENSOARG00020039849	0.625271	3.5108	3.26436	0.0028037	0.392659	-1.62215
ENSOARG00020037565	1.62434	0.612103	3.25203	0.0028941	0.399495	-2.84888
RCSD1	0.935809	1.44539	3.23082	0.00305615	0.414051	-2.25126
CPXM2	1.63061	-0.65194	3.19334	0.003364	0.422527	-3.51502
PPP1R42	0.841627	3.14127	3.18619	0.00342606	0.422527	-1.85197
ENSOARG00020037230	0.739484	1.69394	3.1706	0.00356507	0.422527	-2.2305
SYT2	-1.50515	0.267775	-3.16376	0.00362777	0.422527	-3.1442
REL	1.44677	0.110899	3.15132	0.00374451	0.422527	-3.1982
ENSOARG00020013861	-1.62253	-0.316683	-3.14087	0.00384528	0.422527	-3.3041
TDRD6	-1.11566	3.22154	-3.13435	0.00390953	0.422527	-1.91432
COL9A3	-0.79741	3.43301	-3.12931	0.00395982	0.422527	-1.9031
ENSOARG00020021230	-0.922315	1.20368	-3.11547	0.00410131	0.422527	-2.62754
ENSOARG00020032078	1.55981	-0.269858	3.11129	0.0041449	0.422527	-3.37702
AQP7	-1.92698	-0.146907	-3.09829	0.00428354	0.422527	-3.28911
APOD	-0.647046	8.69625	-3.0809	0.00447592	0.431834	-2.33082
DUSP16	-1.6392	-0.535559	-3.07833	0.00450493	0.431834	-3.40634
ENSOARG00020033259	0.858943	1.39902	3.07399	0.00455461	0.431834	-2.56006
ITIH2	-1.63903	0.968024	-3.07226	0.00457451	0.431834	-2.78962
GAL3ST1	-0.813377	1.50524	-3.05392	0.00479065	0.433407	-2.49658
TRIM47	-0.937131	1.80796	-3.03957	0.00496649	0.433407	-2.39825
TTLL11	-1.2744	0.237657	-3.03207	0.00506091	0.433407	-3.21428
CRYAB	-0.843361	7.03318	-3.0248	0.00515397	0.433407	-2.32477
PBX1	-1.40936	0.800467	-3.01889	0.00523086	0.43736	-2.92026
CA14	-1.19474	2.11445	-2.99865	0.00550237	0.439949	-2.43837
ENSOARG00020035325	-0.726777	1.59248	-2.97639	0.00581657	0.449968	-2.63225
ENSOARG00020005819	-0.957415	0.353125	-2.97232	0.00587571	0.449968	-3.07189
SYNGR2	-0.625731	3.67308	-2.95216	0.00617776	0.454305	-2.24538
ENSOARG00020038480	-1.02022	1.01579	-2.95153	0.00618739	0.454305	-2.87495
SOX10	-0.761223	2.48536	-2.94033	0.00636167	0.454305	-2.38811
GPRC5C	-0.714232	2.18255	-2.92399	0.00662439	0.454305	-2.46417
ENSOARG00020033980	-0.988729	2.01215	-2.91842	0.0067163	0.454305	-2.49128
ENSOARG00020026948	0.746726	1.5217	2.91765	0.00672911	0.454305	-2.68922
SERINC5	-0.773278	1.8999	-2.91691	0.00674131	0.454305	-2.55242
RABEP2	0.71109	1.8062	2.90664	0.0069144	0.454305	-2.65563
DYNLT5	-0.877305	0.880623	-2.89735	0.00707462	0.454305	-2.9974
SPATS1	-0.828934	1.78747	-2.88332	0.0073234	0.454305	-2.62999
C5orf34	0.991235	0.754306	2.87634	0.00745008	0.454305	-3.1773
ENSOARG00020028612	0.707477	3.15844	2.8736	0.00750035	0.454305	-2.41288
ENSOARG00020026019	-0.619995	1.57309	-2.8711	0.00754663	0.454305	-2.73475
NOL4L	-0.604977	2.46294	-2.86786	0.00760694	0.454305	-2.5163
ENSOARG00020002967	-0.872555	3.12319	-2.86044	0.00774665	0.4573	-2.4535
LOX	-1.11516	0.947319	-2.85857	0.0077821	0.4573	-3.04653
COL13A1	0.947158	1.83873	2.84275	0.00808943	0.459561	-2.75942
XRRA1	1.08762	0.697796	2.80947	0.00877357	0.471724	-3.19546
ENSOARG00020008144	-2.50473	0.014253	-2.80518	0.0088657	0.471724	-3.51948
C3H2orf81	-0.712336	1.39854	-2.79903	0.00899929	0.471724	-2.91155
PLPP2	-1.02708	1.41356	-2.79626	0.00905996	0.471724	-2.92077
ENSOARG00020040592	1.76021	-0.0723074	2.79168	0.00916129	0.471724	-3.57266
VAV1	-0.832586	1.47343	-2.78023	0.00941929	0.471724	-2.92428
FBLN2	1.01176	1.23983	2.77844	0.00946014	0.471724	-3.06365
INTS1	-0.656457	1.42152	-2.7746	0.00954848	0.471724	-2.90681
MTHFD2L	-0.702007	2.30102	-2.77219	0.0096044	0.471724	-2.69871
ENSOARG00020026562	0.607433	1.31499	2.76494	0.00977427	0.472296	-2.96239
MBP	-1.02933	9.58006	-2.75935	0.00990741	0.472296	-3.12031
MOBP	-1.28108	4.67436	-2.75837	0.00993075	0.472296	-2.66634
S1PR3	0.610555	3.97313	2.75638	0.00997852	0.472296	-2.63609
ENSOARG00020037194	1.69216	-0.705242	2.75472	0.0100188	0.472296	-3.76742
BUB1	1.18069	0.213371	2.75029	0.0101264	0.472296	-3.39138
ENSOARG00020030210	1.07386	-0.499435	2.74691	0.0102092	0.474228	-3.58486
COL15A1	0.730499	2.35786	2.73883	0.0104099	0.476525	-2.7586
STIM1	-0.659833	2.20735	-2.73168	0.0105905	0.476525	-2.79946
ENSOARG00020031346	-1.9627	-0.86302	-2.72795	0.0106859	0.476525	-3.75213
ENSOARG00020012345	-1.3875	0.222309	-2.71773	0.0109515	0.476525	-3.51082
TNNI3K	1.63644	-0.0713828	2.71229	0.0110955	0.476525	-3.48562
ENSOARG00020014110	-0.717856	2.21696	-2.71191	0.0111055	0.476525	-2.80321
CP	-1.55423	1.37862	-2.7111	0.0111271	0.476525	-3.08567
ENSOARG00020037154	0.873532	1.17922	2.71041	0.0111455	0.476525	-3.1603
ENSOARG00020035464	0.641744	1.50131	2.70773	0.0112172	0.476525	-2.97908
ENSOARG00020039756	0.796807	1.87943	2.70646	0.0112516	0.476525	-2.90062
CLIC2	-0.683711	1.16465	-2.69592	0.011539	0.476525	-3.06491
ENSOARG00020037508	0.785836	1.55544	2.69202	0.0116472	0.476525	-3.01814
ENSOARG00020039770	-1.00109	7.91631	-2.69119	0.0116702	0.476525	-3.14163
KAT6A	-0.620125	2.1305	-2.69116	0.011671	0.476525	-2.85209
SELENOP	-0.829856	2.01842	-2.68523	0.0118375	0.479414	-2.89412
NANOS3	1.13831	-0.211043	2.6777	0.012052	0.479591	-3.65641
ENSOARG00020029551	0.984618	0.67289	2.67766	0.0120532	0.479591	-3.29956
ENSOARG00020034652	-0.850589	1.52391	-2.67509	0.0121274	0.479591	-3.02742
COL21A1	0.58984	2.72673	2.66692	0.0123657	0.485079	-2.82738
CFAP107	-1.48913	-0.361998	-2.65314	0.0127775	0.490792	-3.68099
ENSOARG00020039323	-0.960316	0.538517	-2.65195	0.0128136	0.490807	-3.34576
TF	-0.92821	6.53203	-2.6395	0.0131979	0.491991	-3.11788
CHTF18	1.27946	-0.225735	2.63909	0.0132108	0.491991	-3.72716
COX4I2	-0.997359	0.333608	-2.63877	0.0132207	0.491991	-3.41325
ENSOARG00020035917	0.913539	0.409774	2.63525	0.0133314	0.491991	-3.42351
TRIM55	1.93411	-0.897665	2.63105	0.0134647	0.492368	-3.86317
PQBP1	1.07966	-0.125038	2.63088	0.0134699	0.492368	-3.6296
PLEKHB1	-0.84283	6.05199	-2.62712	0.0135903	0.492368	-3.09372
ENSOARG00020038936	0.863442	1.3119	2.6201	0.0138175	0.493099	-3.21
BCAS1	-0.74139	8.69163	-2.61921	0.0138468	0.493099	-3.35529
ENSOARG00020029636	0.722326	1.2433	2.61492	0.0139876	0.49466	-3.19866
CENPU	-0.653745	4.78567	-2.61427	0.0140092	0.49466	-2.97885
PLP1	-0.96121	9.10891	-2.60527	0.0143096	0.497333	-3.41961
ITGAL	-1.58215	-0.276415	-2.59975	0.0144968	0.500363	-3.67216
FSTL5	0.585401	4.37662	2.59795	0.0145585	0.500363	-2.97423
ENSOARG00020038279	1.4188	-0.545313	2.59526	0.0146506	0.500363	-3.70102
AHSG	-1.58741	2.40719	-2.58554	0.0149894	0.505921	-3.04417
NUDT8	-0.763055	0.418997	-2.58163	0.0151274	0.505921	-3.49173
RGR	-0.759302	3.78246	-2.58083	0.0151559	0.505921	-2.95637
ENSOARG00020003531	-0.828706	8.88819	-2.57166	0.0154852	0.505921	-3.47843
GPNMB	0.901263	0.783174	2.56772	0.0156289	0.507468	-3.47749
ENSOARG00020030452	0.812813	1.40438	2.56094	0.0158786	0.507468	-3.21863
ENSOARG00020032286	0.970046	-0.201518	2.55966	0.0159263	0.507468	-3.67372
HAPLN2	-1.54796	1.02977	-2.55934	0.0159381	0.507468	-3.38436
ABCA7	-0.584371	2.05517	-2.55525	0.0160911	0.507468	-3.08405
ENSOARG00020034656	-1.2409	-0.389943	-2.54963	0.0163038	0.509159	-3.64449
ENSOARG00020034724	-0.870202	-0.255306	-2.53008	0.0170635	0.517251	-3.68385
TSPAN15	-0.694385	4.15113	-2.52882	0.0171133	0.517251	-3.08417
H1-6	-0.865135	1.79334	-2.52408	0.017303	0.518808	-3.14659
ENSOARG00020040904	-1.25945	-0.379331	-2.51409	0.0177086	0.52463	-3.6791
ENSOARG00020008042	-0.675797	0.86822	-2.51226	0.0177841	0.52463	-3.39879
ENSOARG00020027586	-0.61437	1.4601	-2.50772	0.0179722	0.526991	-3.29512
ENSOARG00020034814	0.949848	0.547719	2.49545	0.0184893	0.527357	-3.52656
ADAMTS4	-0.955762	3.52613	-2.49221	0.0186284	0.527357	-3.11266
TRMT61A	-0.83984	0.963626	-2.48687	0.0188594	0.527357	-3.42341
CTDSP1	0.688386	2.70384	2.48665	0.0188692	0.527357	-3.12631
TPBG	-0.99917	2.73514	-2.48562	0.0189138	0.527357	-3.12577
GADD45B	-1.30397	0.352245	-2.48547	0.0189204	0.527357	-3.60858
AEN	-1.07421	0.288914	-2.4833	0.0190152	0.527952	-3.59932
ZNF483	-1.16906	-0.133729	-2.47712	0.0192881	0.532517	-3.70183
PLEKHH1	-0.870196	2.73004	-2.4734	0.0194541	0.533634	-3.15325
SCLY	-0.774806	1.17098	-2.46749	0.0197202	0.533634	-3.379
ENSOARG00020034783	-0.834575	0.904142	-2.46476	0.0198445	0.533634	-3.47765
EEF1AKMT3	-1.10358	-0.494297	-2.46295	0.0199269	0.533634	-3.79675
ANKRD55	0.685563	1.38577	2.46029	0.0200491	0.533634	-3.35726
SLC13A3	-0.662052	3.89829	-2.45573	0.0202599	0.533634	-3.19953
EPS8L2	-1.50885	-0.577359	-2.45193	0.020437	0.533634	-3.84863
WDFY4	0.963395	0.0277869	2.45166	0.0204498	0.533634	-3.77643
ENSOARG00020008388	0.927047	0.294125	2.44995	0.0205301	0.533634	-3.64243
BAIAP3	0.936541	0.456489	2.44989	0.0205328	0.533634	-3.61419
ENSOARG00020036645	0.719654	0.944659	2.44806	0.0206194	0.534935	-3.46082
ENSOARG00020038678	1.20821	-0.164832	2.44343	0.0208387	0.536919	-3.79306
CDCP1	-0.616152	3.14606	-2.44011	0.0209979	0.536919	-3.19599
THSD7B	-1.38876	-0.633613	-2.43254	0.0213643	0.536919	-3.86653
ZNF653	-1.05289	0.662863	-2.43246	0.021368	0.536919	-3.54609
PLA2G4A	0.623639	2.41608	2.43004	0.0214864	0.536919	-3.24511
GJC2	-1.052	2.89878	-2.42961	0.0215075	0.536919	-3.21462
ZBTB5	-1.28769	-0.735425	-2.4234	0.0218142	0.538806	-3.95086
NCOA5	-0.642376	1.25339	-2.41696	0.0221368	0.538806	-3.44719
SLC25A10	0.682871	1.95075	2.41367	0.0223032	0.538806	-3.29745
ENSOARG00020037458	0.855117	0.701913	2.40761	0.0226126	0.538806	-3.58983
STAR	-0.670112	1.32886	-2.40493	0.0227504	0.538806	-3.38086
ERN1	0.611768	1.68068	2.40326	0.022837	0.538806	-3.36904
MAG	-0.879132	6.06352	-2.40085	0.0229626	0.539578	-3.54847
MMP13.1	0.904346	1.25982	2.3957	0.0232323	0.543896	-3.4648
FAM107B	-0.625323	4.28185	-2.38944	0.023564	0.546935	-3.35614
ANPEP	-0.817814	1.62678	-2.38642	0.0237254	0.546935	-3.42149
ENSOARG00020034655	0.64973	1.80788	2.38623	0.0237359	0.546935	-3.37759
ENSOARG00020038063	0.638	1.44121	2.37563	0.0243113	0.549018	-3.45969
SGCG	1.29144	0.618013	2.37381	0.0244115	0.549018	-3.6672
PPP1R36	-1.24452	-0.245619	-2.37304	0.024454	0.549018	-3.83919
EVI2A	-0.680955	4.588	-2.37288	0.0244629	0.549018	-3.41324
CSRNP1	-0.802481	0.961603	-2.37249	0.0244845	0.549018	-3.54705
OSBPL3	0.583362	3.14779	2.3681	0.0247282	0.549018	-3.31409
CLEC5A	-1.17087	0.23851	-2.36694	0.0247927	0.549018	-3.74669
PLA2G5	1.51535	0.302912	2.36668	0.0248074	0.549018	-3.80184
ENSOARG00020034433	1.16392	0.924765	2.36425	0.0249434	0.549018	-3.60504
COL4A3	0.996754	1.38472	2.3641	0.024952	0.549018	-3.48409
ENSOARG00020033657	1.15321	-0.492488	2.35664	0.0253744	0.54907	-3.90351
IGF-I	-0.903908	0.646388	-2.35266	0.0256029	0.550509	-3.60776
TNFAIP3	1.12292	0.178319	2.35003	0.0257548	0.550876	-3.79631
ENSOARG00020037837	1.21709	-0.239488	2.3479	0.0258781	0.550876	-3.88868
KLK6	-1.81697	2.32152	-2.34619	0.0259776	0.550876	-3.40986
HOGA1	1.31556	-0.539684	2.34108	0.0262771	0.554503	-3.94062
ENSOARG00020030512	0.8963	1.37029	2.33686	0.0265268	0.556871	-3.51985
PLEKHF1	0.736631	0.927533	2.33451	0.026667	0.55824	-3.62624
ENSOARG00020035825	1.09364	0.453812	2.3283	0.02704	0.562078	-3.73188
ZNF772	1.39904	-0.831746	2.32597	0.027181	0.562078	-3.98166
ENSOARG00020021474	-0.696119	1.58686	-2.3255	0.0272097	0.562078	-3.47215
ENSOARG00020029303	0.672895	1.49225	2.32447	0.0272725	0.562078	-3.50382
KLF4	-1.07314	0.547036	-2.32382	0.0273124	0.562078	-3.70443
CTXN3	0.713004	3.30574	2.32126	0.0274686	0.562812	-3.39369
ENSOARG00020009042	-0.881051	2.17773	-2.31961	0.0275701	0.562812	-3.40736
PLLP	-0.592121	4.05164	-2.31875	0.0276235	0.562812	-3.45568
ENSOARG00020027781	1.0593	-0.361606	2.3176	0.0276944	0.562812	-3.92934
TMC7	-0.705573	3.06605	-2.31556	0.0278203	0.563804	-3.39931
KIF16B	-0.596221	2.00807	-2.31204	0.0280397	0.564356	-3.43192
ACSM1	1.06261	0.0728128	2.30538	0.0284587	0.569064	-3.79025
CHN2	-0.671207	3.30047	-2.29816	0.0289195	0.570005	-3.4428
PPM1J	0.878524	0.991737	2.29769	0.0289495	0.570005	-3.61146
CLDN11	-0.795511	6.74986	-2.29161	0.0293436	0.571809	-3.84529
ENSOARG00020029103	0.946525	0.344715	2.29153	0.0293486	0.571809	-3.7886
LRP5	-0.584848	2.0541	-2.28384	0.0298532	0.572413	-3.48506
DNAH11	-1.26584	-0.544984	-2.28362	0.0298681	0.572413	-3.95999
ENSOARG00020033425	0.672819	3.30602	2.28286	0.0299183	0.572413	-3.46032
DENND1C	1.2288	-0.0476997	2.28213	0.0299664	0.572413	-3.90898
ENSOARG00020036429	-1.03945	-0.270455	-2.27646	0.0303451	0.575379	-3.94199
LIPE	-0.741291	1.20393	-2.27035	0.0307579	0.575379	-3.63279
ENSOARG00020031232	1.23984	-0.196814	2.26903	0.030848	0.575379	-3.9066
GALNT6	-1.0303	1.62575	-2.26837	0.0308925	0.575379	-3.5593
SUPT7L	-1.02507	0.701742	-2.25811	0.0315998	0.576748	-3.75275
ADGRV1	-0.622938	1.10906	-2.25749	0.0316434	0.576748	-3.64725
SLC8A2	0.800989	0.558581	2.25626	0.0317292	0.576748	-3.7794
ENSOARG00020038583	0.788269	1.52603	2.25372	0.031907	0.577802	-3.56805
ENSOARG00020028894	1.13172	-0.522087	2.25309	0.0319513	0.577887	-3.96256
ERMN	-0.905887	4.98209	-2.25196	0.0320307	0.577902	-3.68691
CAV1	-0.736558	0.438727	-2.24256	0.0326999	0.580745	-3.77376
SFRP2	-0.71093	2.07786	-2.24221	0.0327249	0.580745	-3.53406
NME9	-1.39779	-0.149036	-2.242	0.0327395	0.580745	-3.86441
ENSOARG00020009636	-1.38072	0.902454	-2.24078	0.0328277	0.580745	-3.71009
ZSCAN2	-0.881127	1.67865	-2.23606	0.0331692	0.582302	-3.56187
PRKCQ	-1.22756	0.358921	-2.23057	0.0335712	0.582302	-3.80477
SNX22	-0.940286	1.08673	-2.22766	0.0337856	0.582302	-3.68328
ENSOARG00020031121	-0.633033	0.49231	-2.22749	0.0337979	0.582302	-3.75899
IGFBPL1	0.767015	1.57974	2.2261	0.0339009	0.582302	-3.59523
ENSOARG00020031515	0.688874	2.53462	2.22475	0.0340015	0.582302	-3.54024
ENSOARG00020038681	1.21848	1.7274	2.22402	0.0340555	0.582302	-3.63441
ENSOARG00020033739	1.20438	-0.236618	2.22319	0.0341175	0.582302	-3.94862
PRKN	-0.94996	0.234827	-2.21876	0.0344497	0.582302	-3.84647
ENSOARG00020011090	-0.78384	0.220307	-2.21831	0.0344832	0.582302	-3.84058
FUT1	0.834219	1.62875	2.21745	0.0345481	0.582302	-3.62763
SGK2	-1.28413	1.91827	-2.2127	0.0349081	0.582302	-3.59694
SLA	0.617816	2.3936	2.20562	0.0354518	0.58615	-3.57089
NMB	-0.779213	5.24697	-2.19981	0.0359031	0.58615	-3.81982
RGL3	0.743194	0.70879	2.19499	0.0362811	0.586496	-3.79921
TEAD1	-0.645932	1.79805	-2.19376	0.0363783	0.586496	-3.63793
PRSS35	1.32964	-0.0242937	2.19305	0.036434	0.586496	-3.9172
PRRC2A	-0.715034	0.471863	-2.192	0.0365173	0.586496	-3.81244
SPPL2B	0.904175	1.15659	2.19177	0.0365356	0.586496	-3.74591
C1RL	-1.23193	0.584798	-2.18369	0.0371815	0.586496	-3.83662
SEPSECS	0.635789	1.41051	2.18165	0.0373462	0.586496	-3.69696
RUNX2	1.06548	1.00899	2.17572	0.0378293	0.586496	-3.78008
SLC2A5	-0.750047	1.17541	-2.17463	0.0379186	0.586496	-3.71686
SLC12A1	-1.02259	0.520335	-2.17141	0.0381832	0.586496	-3.84786
ESR2	-0.736202	1.42557	-2.16974	0.0383215	0.586496	-3.67567
CHRNE	1.41987	-0.724854	2.16738	0.0385172	0.586496	-4.11897
ENSOARG00020027135	1.07181	0.727851	2.167	0.0385489	0.586496	-3.84757
ENSOARG00020035903	0.582232	1.28901	2.16534	0.0386872	0.586496	-3.72008
ENSOARG00020015520	1.03588	-0.636932	2.16353	0.0388388	0.586496	-4.0097
ENSOARG00020023561	-0.688772	0.463844	-2.16237	0.0389358	0.586496	-3.85081
ENSOARG00020026418	0.839418	2.43592	2.16234	0.0389384	0.586496	-3.63569
ENSOARG00020035313	-0.984006	0.0860104	-2.15436	0.0396145	0.586496	-3.94911
ENSOARG00020033987	0.996779	0.693541	2.15356	0.0396823	0.586496	-3.85544
KDM7A	-1.01633	0.845793	-2.1528	0.0397477	0.586871	-3.78468
ZBTB22	1.15811	0.241945	2.14829	0.0401347	0.588228	-3.94913
GATD3	0.58005	2.06605	2.14729	0.0402216	0.588228	-3.66326
ENSOARG00020028951	0.988764	0.359717	2.14585	0.0403463	0.588228	-3.9036
NCAPD2	0.586296	2.10751	2.14584	0.0403466	0.588228	-3.66772
TBC1D22B	-0.713904	0.16479	-2.13675	0.0411418	0.589088	-3.93577
ENSOARG00020039189	0.811799	0.656523	2.13657	0.0411579	0.589088	-3.87892
ENSOARG00020036475	1.00751	1.17808	2.13402	0.0413835	0.589088	-3.78845
MAN2A1	-1.00964	-0.25045	-2.13323	0.0414533	0.589088	-4.0211
SLCO5A1	0.647467	1.73098	2.13315	0.0414608	0.589088	-3.6993
ENSOARG00020035704	-1.03945	1.83463	-2.13146	0.0416114	0.589088	-3.69661
DCDC2	0.835094	2.37408	2.13089	0.0416614	0.589088	-3.6794
ENSOARG00020027587	1.04064	0.464038	2.12774	0.0419438	0.589088	-3.89016
TMEM125	-0.845233	2.22317	-2.12721	0.0419914	0.589088	-3.68875
ENSOARG00020039524	0.684649	0.732661	2.12027	0.0426189	0.589615	-3.84762
IGF1R	-0.739198	0.820698	-2.11879	0.0427539	0.589615	-3.8011
ENSOARG00020035068	0.759705	0.359299	2.11866	0.0427657	0.589615	-3.93025
NRG4	0.759971	1.53396	2.11499	0.0431023	0.590549	-3.77037
ENSOARG00020034477	-0.61357	3.70685	-2.11321	0.043266	0.590549	-3.7857
NEMP1	-1.05924	-0.199142	-2.11184	0.0433929	0.590552	-3.98593
CRHR2	-1.17909	-0.551668	-2.11156	0.0434189	0.590552	-4.07751
GPAM	-0.580127	3.45576	-2.10946	0.0436136	0.590552	-3.75652
ZBTB44	0.585661	1.46666	2.10936	0.0436228	0.590552	-3.76054
ENSOARG00020018054	2.67282	2.6312	2.10757	0.043789	0.590552	-3.71167
GYG2	-0.604249	0.871358	-2.10505	0.0440247	0.590552	-3.8221
ART3	1.00208	0.214328	2.1026	0.0442546	0.590552	-3.94465
ZNF219	0.965139	0.165126	2.10253	0.0442613	0.590552	-3.98286
ENSOARG00020005723	-0.975086	-0.140444	-2.10158	0.0443511	0.590552	-4.02264
FAM53B	-0.620426	1.81416	-2.10122	0.0443852	0.590552	-3.74722
NFKBID	-0.824792	0.0209892	-2.09806	0.0446839	0.592761	-3.96939
ENSOARG00020032393	1.36387	-0.260131	2.09285	0.0451815	0.595339	-4.11132
AGRN	0.706499	0.798574	2.09206	0.0452566	0.595339	-3.87196
ENSOARG00020022450	0.835031	0.359383	2.08599	0.0458429	0.59944	-3.94296
CPVL	-1.82312	-0.941846	-2.08335	0.0461006	0.601734	-4.11985
DSC2	0.942809	0.775513	2.08197	0.0462349	0.602906	-3.86176
ENSOARG00020037822	-0.753333	0.269525	-2.0801	0.0464186	0.60394	-3.94245
HTR2B	1.05961	0.509971	2.07993	0.0464347	0.60394	-3.97009
ENSOARG00020030044	0.937514	-0.214781	2.07733	0.0466907	0.604747	-4.04676
UBE2R2	-0.750172	-0.0519345	-2.07679	0.0467447	0.604747	-4.02265
MYOM1	-0.863109	0.0322486	-2.0742	0.0470012	0.605922	-4.02203
COL19A1	0.79376	0.0407245	2.07264	0.0471565	0.606321	-4.03168
TMEM88B	-0.886122	3.41847	-2.0721	0.0472105	0.606482	-3.80835
STIL	-0.875022	0.754896	-2.06982	0.0474378	0.608335	-3.9027
PGM5	0.582605	1.58624	2.06896	0.047524	0.608374	-3.78406
ENPP6	-0.742633	1.95098	-2.0652	0.0479026	0.610785	-3.77684
CHST8	-0.586542	1.86051	-2.06288	0.0481374	0.610936	-3.78591
ENSOARG00020036053	-0.85981	0.748275	-2.06047	0.0483817	0.610936	-3.88416
HHIP	-0.813062	1.52757	-2.05833	0.0486	0.610936	-3.80666
MEIKIN	0.797304	1.49692	2.05779	0.0486561	0.610936	-3.83217
ENSOARG00020007831	-0.764633	0.731074	-2.05543	0.0488982	0.610936	-3.9277
ENSOARG00020033953	0.812562	0.48233	2.05464	0.0489791	0.610936	-3.95886
SPEF2	0.649748	2.52106	2.05439	0.0490045	0.610936	-3.789
H1-5	-0.941178	-0.253076	-2.0525	0.0492001	0.610936	-4.0421
TSPAN18	0.969504	-0.322495	2.05248	0.0492018	0.610936	-4.09904
ENSOARG00020034394	-0.719573	1.46121	-2.05191	0.0492605	0.610936	-3.84299
ENSOARG00020030649	1.03468	0.434044	2.05156	0.0492971	0.610936	-4.00003
ATP10B	-0.850869	0.678728	-2.05033	0.0494251	0.610936	-3.9434
FAM180A	-1.30882	-0.803575	-2.04906	0.0495566	0.610936	-4.13352
PMP2	-1.33228	1.02524	-2.049	0.0495628	0.610936	-3.91966
DEPTOR	-0.750263	0.794172	-2.04713	0.0497576	0.610936	-3.8874
ENSOARG00020033845	-0.956946	0.0647693	-2.04562	0.0499156	0.610936	-4.027
