# Supplementary material for: IL-1 modulation preserves biomolecular, structural and functional integrity of the somatosensory cortex after fetal inflammation
Source: Research Square preprint supplement (doi:10.21203/rs.3.rs-7882525/v1), 2025-11-07
Supplement: Supplementary file 1 [file 22c700a67cb2c33fed27e91c.pdf]

## Supplementary Figures

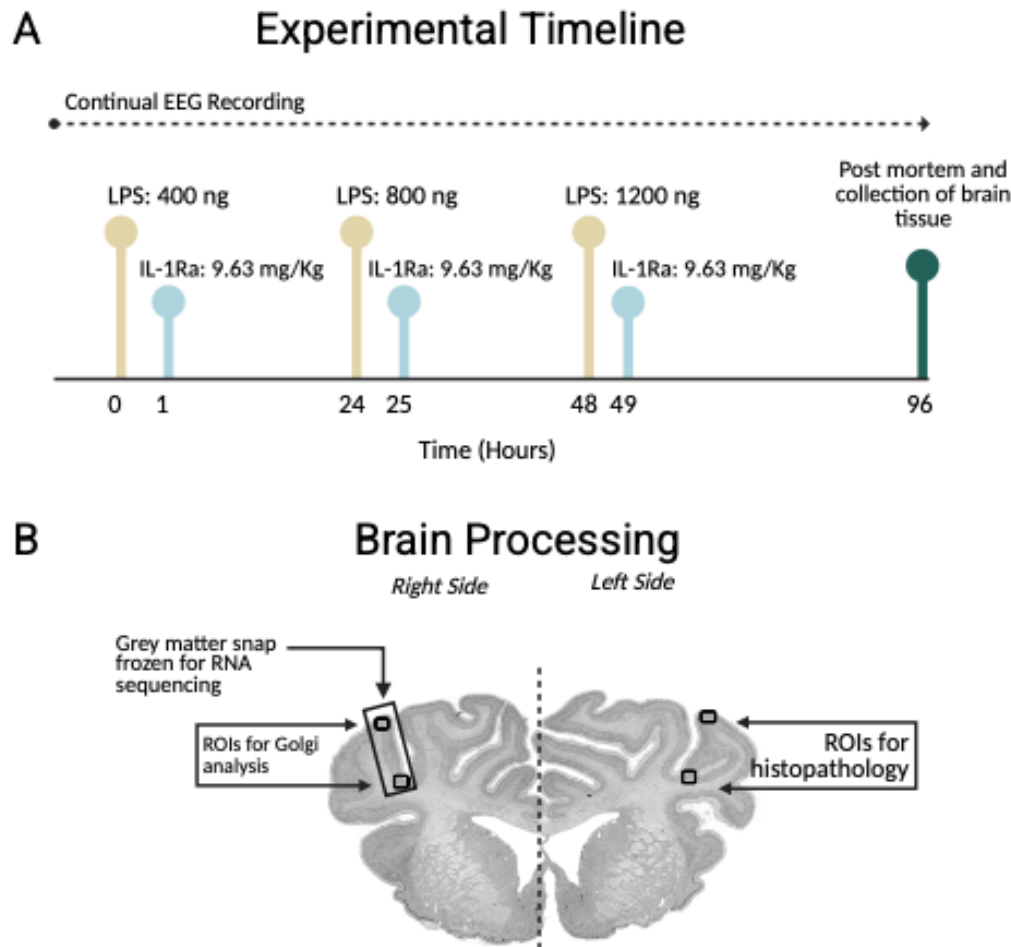

**Supplementary Figure 1. Experimental timeline (A).** The study consisted of 3 groups: control (vehicle,  $n = 9$ ), LPS + vehicle ( $n = 8$ ) and LPS+IL-1Ra ( $n = 9$ ). The yellow vertical lines show the timing of LPS/vehicle infusions. The vertical blue lines show the timing of IL-1Ra infusions (9.63 mg/kg) which were started 1 hour after LPS infusions. Controls received an equivalent volume of vehicle (saline) during the infusion periods. Continuous EEG recordings were performed throughout the experimental period. At 96 hours, brains were collected for pathological assessment. **Brain processing (B).** The right side of the brain was divided for RNA sequencing analysis and Golgi analysis of neurons. Squares indicate regions of interest for neuronal analysis. The left side of the brain was paraffin embedded for immunohistochemical analysis. Squares indicate regions of interest for histopathological assessment. Figure created with biorender.com.
