# Supplementary material for: IL-1 modulation preserves biomolecular, structural and functional integrity of the somatosensory cortex after fetal inflammation
Source: Research Square preprint supplement (doi:10.21203/rs.3.rs-7882525/v1), 2025-11-07
Supplement: Supplementary file 2 [file 2eb2a76dea942945ba6f5f2c.pdf]

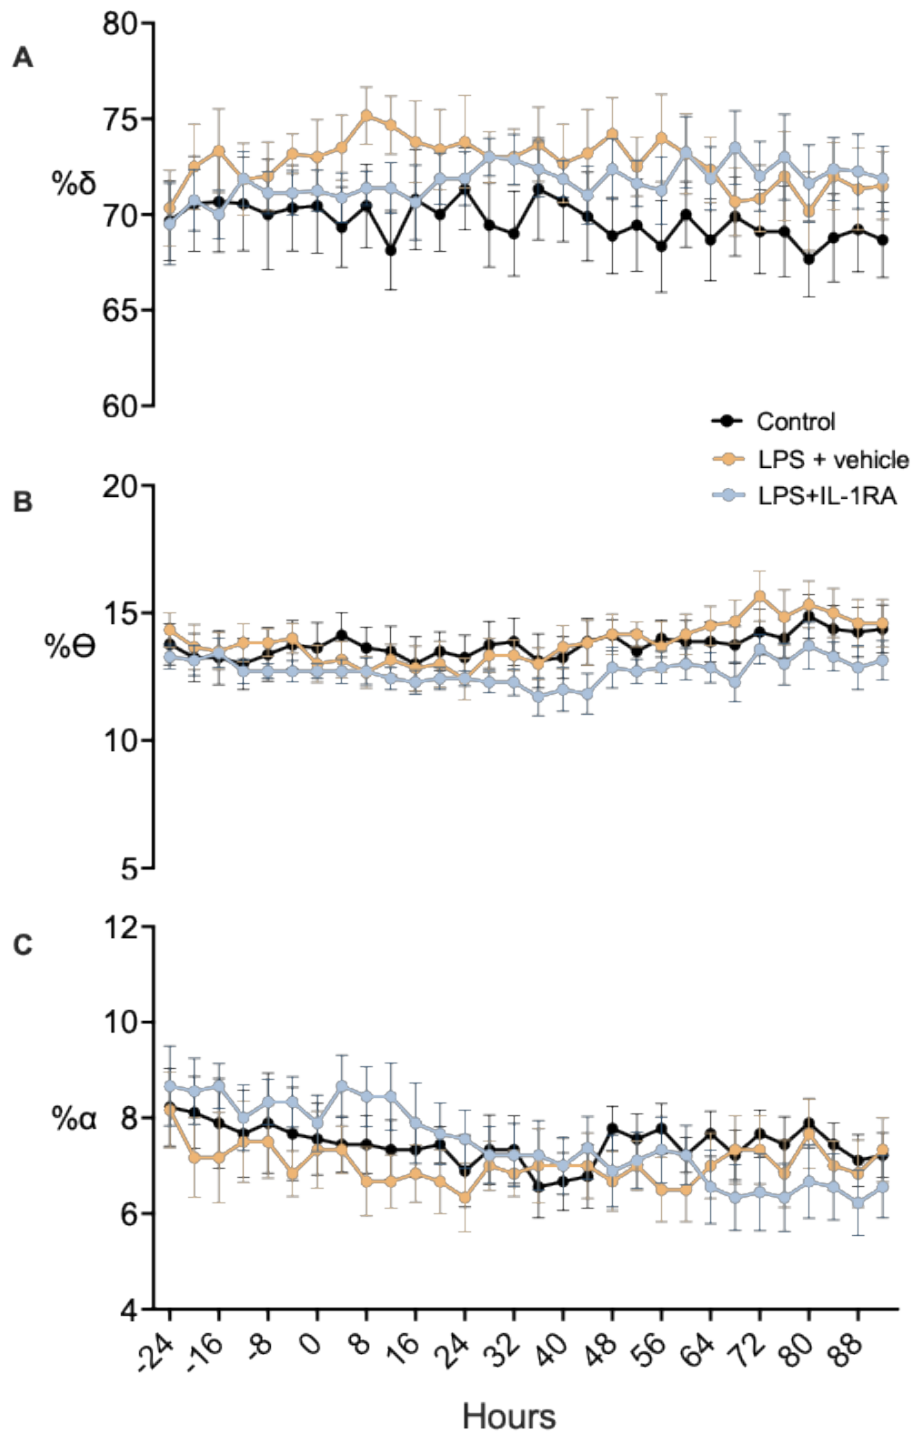

**Supplementary Figure 3.** Time course changes in physiological activity. % delta, %theta, and %alpha activity in the control (black,  $n = 9$ ), LPS + vehicle (orange,  $n = 8$ ), and LPS + IL-1Ra (blue,  $n = 9$ ) groups. Data are 4 - hourly means  $\pm$  standard error (SE). \* $P < 0.05$  LPS + vehicle vs. control. # $P < 0.05$  LPS + vehicle vs LPS + IL-1Ra.
