# Supplementary material for: IL-1 modulation preserves biomolecular, structural and functional integrity of the somatosensory cortex after fetal inflammation
Source: Research Square preprint supplement (doi:10.21203/rs.3.rs-7882525/v1), 2025-11-07
Supplement: Supplementary file 2 [file 8e34fbea116a3d8ff52e743c.xlsx]

## Sheet: Sheet1
Supplementary Table 1. Differential expression analysis results between the LPS + Vehicle and Control Groups.
Gene	log2FC	AveExpr	t	P.Value	adj.P.Val	B
ADAMTS19	-1.04812	1.21565	-2.73711	0.0104532	0.619817	-3.01069
ADGRB1	-0.630538	2.51553	-3.22972	0.0030648	0.544367	-1.871
ADGRD1	-1.13198	1.3509	-2.0985	0.0446419	0.678808	-3.79822
AFMID	-1.01822	-0.219276	-2.59183	0.0147693	0.619817	-3.6595
AGTR1	1.32559	0.389348	2.09434	0.0450382	0.678808	-3.99017
AK7	1.35397	0.0286885	2.13299	0.0414747	0.678054	-4.01017
ALB	0.688336	1.81304	2.13321	0.0414549	0.678054	-3.73501
ANGPTL5	-1.65342	1.69771	-3.75058	0.000779785	0.420438	-1.46434
ARSL	1.12182	-0.410425	2.05532	0.0489093	0.684653	-4.13031
ATAD5	0.864124	0.885491	2.35287	0.0255904	0.624361	-3.60679
B2M	0.804636	3.61786	4.24248	0.000204798	0.335742	0.394812
B3GALT5	-1.22367	0.883204	-2.67808	0.0120411	0.619817	-3.23965
BTBD9	0.617917	2.77184	2.22948	0.0336516	0.665391	-3.53257
C16orf96	-1.04603	-0.518006	-2.14851	0.0401161	0.675256	-4.03077
C1QA	0.76277	4.1645	4.31666	0.000166989	0.335742	0.760422
C5orf34	-1.18885	0.754306	-3.39192	0.00201453	0.515027	-2.56316
C7orf57	0.912375	0.652081	2.06835	0.0475855	0.68323	-3.94523
CALB1	0.769616	1.48336	2.40316	0.022842	0.619817	-3.44819
CALHM2	1.02708	0.896856	2.11219	0.0433604	0.678808	-3.91621
CAPN8	-1.01035	-0.292929	-2.18877	0.0367746	0.66561	-4.00456
CASC1	0.672365	6.53868	3.3397	0.0023076	0.515027	-1.54907
CBFB	0.619879	2.19733	2.51007	0.0178746	0.619817	-3.13759
CCT6B	1.55503	-0.245428	2.11354	0.0432355	0.678808	-4.11656
CD14	0.727796	2.69418	2.90264	0.00698309	0.619817	-2.43937
CD163	0.714007	0.377617	2.15112	0.0398917	0.675256	-3.88216
CDT1	-0.845915	1.64341	-4.03425	0.000362104	0.335742	-0.999146
CFAP45	0.604772	2.897	2.15635	0.0394444	0.675256	-3.64586
CFB	0.715808	4.26884	2.62158	0.0137693	0.619817	-2.90948
CFD	0.61104	4.95275	4.32612	0.00016269	0.335742	0.885526
CHRNE	-1.50156	-0.724854	-2.19898	0.0359675	0.66561	-4.09137
CHTF18	-1.29169	-0.225735	-2.56428	0.015755	0.619817	-3.75906
CILP	1.98138	0.0296644	3.25807	0.0028495	0.54392	-3.16758
CLCN7	-0.796058	0.911085	-2.52952	0.0170854	0.619817	-3.3979
CLEC7A	1.1811	1.25753	3.62362	0.00109442	0.427568	-1.96047
CLIC2	0.8222	1.16465	2.93416	0.00645968	0.619817	-2.80554
CNN2	0.833845	1.36675	2.36418	0.0249477	0.619817	-3.49136
COL13A1	-0.749896	1.83873	-2.10928	0.0436304	0.678808	-3.74498
COL25A1	-0.806548	1.82355	-2.36878	0.0246901	0.619817	-3.39372
COX4I2	0.941046	0.333608	2.34469	0.0260651	0.624361	-3.69734
CPXM2	-1.86949	-0.65194	-3.59016	0.00119608	0.427568	-3.19867
CRH	-0.642245	5.14345	-5.2484	1.25499e-05	0.18363	3.16667
CSF2RB	1.05025	0.750294	2.90353	0.00696766	0.619817	-3.09033
CTXN3	-0.81682	3.30574	-2.56048	0.0158957	0.619817	-2.98577
DARS2	-0.618992	1.23271	-2.12137	0.0425192	0.678808	-3.75756
DEPTOR	1.01659	0.794172	2.46118	0.0200082	0.619817	-3.49585
DIAPH3	-0.998358	4.53873	-3.10444	0.00421747	0.571651	-1.94
DUSP5	-0.816574	1.49282	-2.41027	0.0224762	0.619817	-3.40171
EEF1AKMT3	1.0047	-0.494297	2.09336	0.0451318	0.678808	-4.06207
EMG1	0.662736	2.7679	2.59541	0.0146456	0.619817	-2.94157
ENSOARG00020000018	1.25805	-0.43338	2.3695	0.0246503	0.619817	-3.96634
ENSOARG00020000587	0.785393	1.39145	2.69847	0.0114688	0.619817	-3.09925
ENSOARG00020001900	1.25567	-0.0414427	2.79285	0.00913532	0.619817	-3.49939
ENSOARG00020002880	-0.862916	0.502826	-2.06752	0.0476681	0.68323	-3.94346
ENSOARG00020002928	0.604413	2.77291	2.36669	0.0248071	0.619817	-3.32189
ENSOARG00020005819	0.854794	0.353125	2.50349	0.0181488	0.619817	-3.54174
ENSOARG00020006863	0.834927	1.78757	2.57266	0.0154491	0.619817	-3.08181
ENSOARG00020007668	-1.27522	2.83699	-2.93342	0.0064715	0.619817	-2.36327
ENSOARG00020009042	0.857124	2.17773	2.08777	0.0456708	0.678808	-3.74008
ENSOARG00020012696	1.89462	1.49151	2.12271	0.0423975	0.678808	-3.86658
ENSOARG00020015171	0.697879	4.18962	2.82184	0.0085133	0.619817	-2.50869
ENSOARG00020015447	0.583702	2.42012	2.44351	0.0208351	0.619817	-3.2212
ENSOARG00020016566	0.641924	3.07609	3.52922	0.00140528	0.437491	-1.19711
ENSOARG00020016687	1.07344	1.72809	2.11423	0.0431719	0.678808	-3.77795
ENSOARG00020019138	1.48609	3.92388	2.79425	0.00910436	0.619817	-2.55978
ENSOARG00020019421	1.97921	0.103383	3.73672	0.000809295	0.420438	-2.84428
ENSOARG00020020253	-0.971312	6.22252	-2.93613	0.00642832	0.619817	-2.47319
ENSOARG00020020448	-0.852258	5.76333	-4.02858	0.000367741	0.335742	0.156792
ENSOARG00020021658	1.05165	3.25039	2.89688	0.00708295	0.619817	-2.39134
ENSOARG00020023309	0.618118	1.88019	2.69738	0.0114986	0.619817	-2.91086
ENSOARG00020023648	0.581598	4.54378	2.09493	0.0449818	0.678808	-3.89563
ENSOARG00020024401	1.16395	4.21351	2.0815	0.0462811	0.678808	-3.86176
ENSOARG00020024803	2.06193	0.0617874	3.613	0.00112573	0.427568	-2.91889
ENSOARG00020025249	0.92483	4.42242	3.87306	0.000560778	0.375432	-0.242218
ENSOARG00020026068	2.19804	-0.0230046	2.67736	0.012062	0.619817	-3.65936
ENSOARG00020026519	-1.06069	0.0680619	-2.04535	0.0499442	0.688768	-4.01538
ENSOARG00020026620	1.10872	0.533123	2.61846	0.0138712	0.619817	-3.46345
ENSOARG00020026656	-1.65326	0.126144	-2.46984	0.0196139	0.619817	-3.62359
ENSOARG00020027335	-0.88045	3.87782	-4.11002	0.000294458	0.335742	0.271079
ENSOARG00020027970	0.608425	3.40449	2.94445	0.00629704	0.619817	-2.26703
ENSOARG00020029728	-1.01693	0.194687	-2.26628	0.0310358	0.65507	-3.77252
ENSOARG00020029793	1.27511	-0.115712	2.08062	0.0463673	0.678808	-4.05284
ENSOARG00020029822	-1.0934	0.398131	-2.26595	0.0310585	0.65507	-3.77976
ENSOARG00020029982	0.86935	0.981581	2.14748	0.040205	0.675256	-3.82798
ENSOARG00020030319	0.681712	2.93885	2.1237	0.0423074	0.678808	-3.69222
ENSOARG00020030480	-1.42226	-0.348925	-2.51834	0.0175352	0.619817	-3.76458
ENSOARG00020031121	0.849844	0.49231	2.65589	0.0126945	0.619817	-3.39025
ENSOARG00020031207	-0.96254	0.479514	-2.34846	0.0258457	0.624361	-3.69241
ENSOARG00020031382	1.92076	-0.282889	2.75311	0.0100578	0.619817	-3.76558
ENSOARG00020031456	0.736591	1.4751	2.18737	0.0368861	0.66561	-3.7101
ENSOARG00020031458	-1.14792	0.947266	-2.31564	0.0278155	0.626149	-3.62309
ENSOARG00020032049	0.815824	0.53326	2.20157	0.0357658	0.66561	-3.84169
ENSOARG00020032118	1.06118	0.58065	2.1553	0.0395339	0.675256	-3.8793
ENSOARG00020032393	-1.68386	-0.260131	-2.55184	0.0162199	0.619817	-3.78057
ENSOARG00020032584	1.62723	-0.362331	2.53785	0.0167577	0.619817	-3.80899
ENSOARG00020033491	0.635856	1.92358	2.53556	0.0168472	0.619817	-3.14413
ENSOARG00020033542	1.0354	5.17226	2.1984	0.0360129	0.66561	-3.81592
ENSOARG00020033980	1.07078	2.01215	2.84016	0.00814088	0.619817	-2.65549
ENSOARG00020033982	0.76484	1.06541	2.39445	0.0232984	0.619817	-3.53298
ENSOARG00020034656	1.87121	-0.389943	3.14735	0.00378251	0.571651	-3.36689
ENSOARG00020034724	0.843358	-0.255306	2.27427	0.0304923	0.650384	-3.89656
ENSOARG00020034841	1.03945	1.14053	2.44031	0.0209883	0.619817	-3.4472
ENSOARG00020035129	0.77831	1.93835	2.85794	0.00779425	0.619817	-2.66065
ENSOARG00020035248	-1.79988	-0.50168	-2.44338	0.0208414	0.619817	-3.8885
ENSOARG00020035319	1.45508	-0.532327	2.09051	0.0454062	0.678808	-4.10561
ENSOARG00020035473	-1.36677	-0.556658	-2.38875	0.0236007	0.619817	-3.88766
ENSOARG00020035568	0.750131	0.840012	2.07657	0.0467659	0.679306	-3.90076
ENSOARG00020035663	1.37087	0.349673	2.30752	0.0283238	0.632723	-3.86392
ENSOARG00020035785	1.03009	1.33414	2.10069	0.0444351	0.678808	-3.86189
ENSOARG00020035796	1.15142	0.489246	2.0562	0.0488182	0.684653	-3.98222
ENSOARG00020035887	-1.06649	1.31294	-2.54722	0.0163956	0.619817	-3.25893
ENSOARG00020036053	0.954457	0.748275	2.08007	0.0464211	0.678808	-3.88231
ENSOARG00020036133	-0.833589	4.86704	-2.70345	0.0113329	0.619817	-2.82238
ENSOARG00020036348	-0.943249	0.312956	-2.61265	0.0140628	0.619817	-3.42105
ENSOARG00020036596	0.949798	0.189209	2.07726	0.0466985	0.679217	-4.01394
ENSOARG00020036597	1.35641	0.0280553	2.64846	0.0129202	0.619817	-3.62181
ENSOARG00020036754	1.04468	0.332063	2.22076	0.0342992	0.66561	-3.87742
ENSOARG00020037082	1.0908	0.657727	2.73142	0.0105972	0.619817	-3.3351
ENSOARG00020037154	-0.871846	1.17922	-2.59645	0.0146097	0.619817	-3.27656
ENSOARG00020037194	-1.35099	-0.705242	-2.04639	0.0498357	0.688768	-4.18209
ENSOARG00020037288	1.81451	0.405154	2.30992	0.0281724	0.631268	-3.89347
ENSOARG00020037506	0.734048	1.17907	2.12918	0.0418145	0.678808	-3.74035
ENSOARG00020037822	0.82071	0.269525	2.09225	0.0452389	0.678808	-3.94449
ENSOARG00020037893	-0.927143	0.643694	-2.24861	0.032268	0.65507	-3.81394
ENSOARG00020037963	2.79748	-0.344777	2.79908	0.00899812	0.619817	-3.67328
ENSOARG00020038220	-1.08326	-0.463856	-2.18412	0.0371471	0.66561	-3.99094
ENSOARG00020038659	-1.2381	1.77687	-2.04556	0.0499225	0.688768	-3.81149
ENSOARG00020038681	-1.284	1.7274	-2.26763	0.0309432	0.65507	-3.56996
ENSOARG00020038936	-0.741159	1.3119	-2.11415	0.0431794	0.678808	-3.79619
ENSOARG00020039350	-1.45999	0.419254	-3.11999	0.00405454	0.571651	-3.10636
ENSOARG00020039947	0.58364	1.70915	2.65044	0.0128597	0.619817	-3.00511
ENSOARG00020040389	0.612009	2.54852	2.57387	0.0154052	0.619817	-3.01136
ENSOARG00020040520	-1.24498	-0.359773	-2.47052	0.0195832	0.619817	-3.815
ENSOARG00020040904	1.83085	-0.379331	3.05186	0.00481553	0.571651	-3.41431
ESR2	0.876731	1.42557	2.33428	0.0266804	0.624361	-3.49229
FAM135B	0.796284	1.18088	2.2914	0.0293567	0.643235	-3.62247
FAM169A	-0.62846	2.72196	-2.92763	0.00656503	0.619817	-2.36845
FBLN1	0.608663	4.71507	2.55137	0.0162376	0.619817	-3.0731
FBLN2	-0.851995	1.23983	-2.20846	0.035233	0.66561	-3.71397
FIGNL1	0.66824	2.37987	2.06742	0.0476789	0.68323	-3.76917
FUT4	-0.580284	0.96826	-2.13107	0.0416455	0.678808	-3.80536
FZD6	-0.710094	2.6206	-3.02636	0.0051338	0.597648	-2.19418
GAS2L3	1	0.478708	3.09687	0.00429899	0.571651	-3.02252
GPAT4	-0.667436	1.84299	-2.64112	0.0131472	0.619817	-3.01037
GPNMB	-1.2654	0.783174	-3.60073	0.00116302	0.427568	-2.28373
GPR149	-0.779239	1.09033	-2.71515	0.0110197	0.619817	-3.11644
GRM2	-0.740129	1.81281	-2.13406	0.0413802	0.678054	-3.68935
GSDMD	1.01535	-0.15405	2.51558	0.0176476	0.619817	-3.75262
GSG1L	0.623512	2.50582	2.51098	0.0178371	0.619817	-3.10912
GYG2	0.760297	0.871358	2.38811	0.0236351	0.619817	-3.54991
H1-5	1.06487	-0.253076	2.12191	0.0424694	0.678808	-4.01151
H1-6	1.04741	1.79334	2.75257	0.0100708	0.619817	-2.84366
H2BC15	-0.927174	-0.232043	-2.20478	0.0355167	0.66561	-3.93374
H2BC26	-0.825425	1.31089	-2.66867	0.0123143	0.619817	-3.11907
HELB	0.623217	1.70901	2.46408	0.0198753	0.619817	-3.28975
HTR2B	-1.13877	0.509971	-2.15525	0.0395386	0.675256	-3.89485
IGF-I	0.910417	0.646388	2.18034	0.0374529	0.66561	-3.79823
IGF1R	1.21786	0.820698	2.96318	0.00601094	0.619817	-2.96575
IGFBP3	0.607305	2.62078	2.31976	0.0275607	0.624361	-3.39657
IL17B	-0.868596	0.777708	-2.1443	0.0404802	0.675256	-3.8272
IRAK2	0.721345	2.0975	2.55123	0.0162429	0.619817	-3.11665
IRAK4	1.00868	1.7979	3.06845	0.00461858	0.571651	-2.49722
ISG15	-0.758059	3.30823	-2.04963	0.0494977	0.688244	-3.85654
KCNC4	-0.593593	1.82661	-2.30884	0.0282407	0.631831	-3.46338
KCNH5	-0.650551	2.08937	-2.60799	0.0142182	0.619817	-2.96739
KIF16B	0.607577	2.00807	2.18777	0.036854	0.66561	-3.60956
KLK14	-1.11238	0.105748	-2.12947	0.0417887	0.678808	-3.95835
LAMA2	0.599657	3.21386	2.26851	0.0308833	0.65507	-3.48292
LMO1	1.5471	1.41672	2.28549	0.0297444	0.643817	-3.63654
LRTM2	-0.776956	1.90831	-3.67038	0.000966324	0.420438	-1.3443
LTBR	1.29032	-0.299198	2.18156	0.0373541	0.66561	-4.02448
LY86	1.20853	0.316094	2.35916	0.0252312	0.623621	-3.72241
MAGIX	0.759328	0.975996	2.51706	0.0175873	0.619817	-3.38826
MAP3K9	-0.690509	1.17107	-2.1056	0.0439731	0.678808	-3.80391
MAPKAPK2	-0.642563	0.929028	-2.3649	0.0249072	0.619817	-3.56134
METTL24	-0.753473	0.877348	-2.65512	0.0127177	0.619817	-3.27431
MMP23B	-0.846574	0.323649	-2.20683	0.0353585	0.66561	-3.85624
MMRN1	1.67469	0.120161	2.90277	0.00698083	0.619817	-3.47529
MVP	0.664224	2.35756	2.88492	0.00729465	0.619817	-2.53413
MX1	-0.629002	4.05517	-2.50036	0.018281	0.619817	-3.13927
MYBPC2	-1.21545	3.0231	-2.45042	0.0205079	0.619817	-3.17776
MYL4	-1.00801	2.67318	-3.25923	0.00284099	0.54392	-1.73889
MYLK3	-1.12987	0.911413	-2.72296	0.0108148	0.619817	-3.15257
MYOC	1.57693	-1.08924	2.13335	0.0414428	0.678054	-4.13992
NCF2	-0.729541	1.60792	-2.14496	0.0404231	0.675256	-3.70372
NEB	0.581683	4.15473	2.67935	0.0120049	0.619817	-2.79182
NECTIN2	0.724269	1.10842	2.32865	0.027019	0.624361	-3.58976
NEMP1	1.19823	-0.199142	2.16511	0.0387067	0.675038	-3.97222
NME9	1.69897	-0.149036	2.39672	0.0231787	0.619817	-3.79913
NOM1	-0.82897	0.94368	-2.11766	0.0428568	0.678808	-3.83809
NPFFR2	-1.13992	0.0988243	-2.19745	0.0360872	0.66561	-3.83123
NR2F2	0.617465	5.1009	2.28019	0.0300955	0.645686	-3.63187
NRG4	-0.869297	1.53396	-2.33232	0.0267976	0.624361	-3.5037
NRK	1.20495	1.24934	2.06868	0.0475521	0.68323	-3.86721
NSUN7	-0.728541	1.04698	-2.53859	0.0167287	0.619817	-3.30089
NUDT12	0.58153	2.19064	2.3134	0.027955	0.628256	-3.42981
OGN	0.735195	5.71965	2.42126	0.0219207	0.619817	-3.43667
OSBPL3	-0.581957	3.14779	-2.2474	0.0323535	0.65507	-3.51159
OSR1	1.27159	-0.17204	2.17447	0.0379316	0.670307	-3.97794
PDGFD	0.67676	1.87252	2.36773	0.0247486	0.619817	-3.39316
PENK	-0.697542	5.13688	-2.55736	0.0160123	0.619817	-3.13758
PIGA	0.930173	0.627879	2.09089	0.0453696	0.678808	-3.97259
PLA2G4A	-0.689351	2.41608	-2.57891	0.0152244	0.619817	-3.00927
PLA2G5	-1.38777	0.302912	-2.06441	0.0479826	0.68323	-4.02635
PLBD1	0.953375	1.92403	2.1892	0.0367405	0.66561	-3.64655
PLEKHA4	-0.615347	1.74961	-2.18669	0.0369409	0.66561	-3.62471
PODN	-0.842097	1.83947	-2.19657	0.0361563	0.66561	-3.60648
POU6F1	-1.31174	-0.798109	-2.22715	0.0338231	0.665537	-4.05661
PPIL6	0.698797	0.925306	2.07549	0.0468732	0.679306	-3.87224
PPL	0.96614	-0.022967	2.56379	0.0157733	0.619817	-3.63806
PPP1R14C	0.643285	2.34387	2.50392	0.0181311	0.619817	-3.13315
PPP1R42	-0.808171	3.14127	-2.90039	0.00702184	0.619817	-2.38449
PRC1	0.991423	1.51611	2.32048	0.027517	0.624361	-3.5628
PRR16	-0.630961	2.27295	-3.01198	0.00532215	0.613179	-2.28855
PSMB8	0.822864	3.68829	3.05563	0.00477014	0.571651	-2.05298
PTER	0.625256	1.95111	2.08589	0.0458531	0.678808	-3.76159
PTH	-1.7196	0.585248	-3.28578	0.00265309	0.540155	-2.57523
PTPN6	0.740909	2.16955	2.63443	0.0133571	0.619817	-2.9579
PTPRT	-0.779089	2.4227	-2.80353	0.00890129	0.619817	-2.62991
RAB5B	1.425	-0.482712	2.78342	0.00934664	0.619817	-3.65029
RABEP2	-0.609828	1.8062	-2.34145	0.0262554	0.624361	-3.44594
RAD9B	0.771035	0.526076	2.14651	0.0402889	0.675256	-3.88755
RARA	-1.14697	0.244306	-2.22867	0.0337107	0.665537	-3.87738
REDIC1	-1.21034	0.682849	-2.9656	0.00597485	0.619817	-2.97767
REL	-1.16907	0.110899	-2.37919	0.0241166	0.619817	-3.82649
RELT	-0.717755	1.59983	-2.42555	0.0217079	0.619817	-3.31838
RFX2	0.985791	0.581211	2.06248	0.0481773	0.68323	-3.96664
RIN1	1.13295	0.290196	2.52178	0.0173955	0.619817	-3.63797
RNASE4	0.603759	3.36032	3.06168	0.00469802	0.571651	-2.05857
RPE65	0.762837	2.66	2.11402	0.043191	0.678808	-3.70286
RTP1	1.04229	1.79018	3.49032	0.00155692	0.455617	-1.90047
S100A4	1.39559	0.693963	2.82136	0.00852318	0.619817	-3.23156
SIX5	-1.07617	0.193745	-2.29018	0.0294369	0.643817	-3.81661
SLC17A7	-0.986987	1.66134	-4.52449	9.40349e-05	0.335742	-0.312344
SLC26A2	0.632361	1.30659	2.11484	0.0431154	0.678808	-3.78628
SLC31A1	0.763028	0.949602	2.49614	0.0184599	0.619817	-3.45692
SLC7A3	1.18966	0.832448	3.15259	0.00373245	0.571651	-2.93228
SPATS1	0.676352	1.78747	2.2386	0.0329854	0.659455	-3.55376
SPPL2B	-0.983416	1.15659	-2.29759	0.0289561	0.640358	-3.6204
STAR	1.10887	1.32886	3.38543	0.0020489	0.515027	-2.18199
STYXL1	1.91899	-0.92663	2.90694	0.00690937	0.619817	-3.6975
SYK	0.958155	1.07776	2.25011	0.0321612	0.65507	-3.69055
SYT12	-0.63952	1.25739	-2.07897	0.0465299	0.678927	-3.79411
SYT14	-0.741922	2.67174	-3.29515	0.00258965	0.540155	-1.69758
TAC3	-0.700265	1.32246	-2.50777	0.0179698	0.619817	-3.31675
TACR3	1.66707	-0.232998	3.08067	0.00447851	0.571651	-3.46713
TAFA4	-0.923018	2.61886	-2.90842	0.00688414	0.619817	-2.42206
TEKT5	-1.1267	-0.145554	-2.10704	0.0438387	0.678808	-4.01452
TEP1	0.815206	1.24204	2.2477	0.0323326	0.65507	-3.66774
TEX11	1.17778	0.693752	2.12309	0.0423628	0.678808	-3.89993
TEX30	-0.687289	2.4997	-3.23702	0.00300788	0.54392	-1.85537
THBS3	0.620762	2.38782	2.73065	0.0106168	0.619817	-2.76993
TMEM134	0.647991	2.60627	2.38821	0.0236296	0.619817	-3.29027
TMEM196	-0.959219	4.92962	-2.67936	0.0120045	0.619817	-2.86551
TMEM200B	-0.875529	0.061023	-2.24013	0.0328746	0.659002	-3.86216
TNMD	-1.08763	0.794101	-2.25521	0.0318028	0.65507	-3.73417
TNPO1	0.619747	3.00092	3.13972	0.0038566	0.571651	-1.96328
TRH	-1.33671	0.110499	-2.62315	0.0137186	0.619817	-3.65605
TRIM47	0.669025	1.80796	2.13731	0.0410926	0.677866	-3.68255
TRIM55	-2.03553	-0.897665	-2.68138	0.0119467	0.619817	-3.80703
TSEN2	0.603731	3.36538	2.66069	0.0125503	0.619817	-2.80672
TSHZ3	-0.727259	5.58024	-3.34127	0.0022982	0.515027	-1.4738
TSPAN1	1.35462	-0.0772241	2.56393	0.0157681	0.619817	-3.72632
TTC39A	-1.09242	0.0568161	-2.05247	0.0492033	0.68566	-4.01235
TWIST1	-1.55532	-0.56581	-2.73034	0.0106248	0.619817	-3.66005
UBXN10	0.848446	1.31478	2.06106	0.048322	0.68323	-3.83242
UCKL1	-0.601303	2.03901	-2.14227	0.0406575	0.675256	-3.67762
UCN	-1.28515	-0.218857	-2.15497	0.0395622	0.675256	-3.963
UNC13D	-0.692214	2.0835	-2.39375	0.0233348	0.619817	-3.32712
UTS2	-1.49859	-0.447099	-3.02538	0.0051465	0.597648	-3.43825
VWA3B	1.34924	0.88672	2.869	0.00758553	0.619817	-3.05668
VWA5B2	-0.800333	0.784731	-2.10392	0.0441307	0.678808	-3.87412
WDFY4	-1.08482	0.0277869	-2.68025	0.0119791	0.619817	-3.56805
WNT16	0.682909	2.33383	2.15207	0.0398102	0.675256	-3.65169
WSCD1	-0.763868	0.562458	-2.7693	0.00967182	0.619817	-3.2078
WTIP	-0.829574	0.774483	-2.7057	0.0112719	0.619817	-3.24684
XG	0.706223	1.95864	2.48091	0.0191202	0.619817	-3.2147
ZNF397	0.788504	1.21473	2.58733	0.0149265	0.619817	-3.2836
ZNF548	1.66572	-0.705086	2.72977	0.0106394	0.619817	-3.76536
ZNF746	-0.604942	1.10903	-2.04832	0.0496336	0.688244	-3.87395
ZSCAN2	0.984121	1.67865	2.23192	0.0334718	0.664531	-3.58609
ZZEF1	0.950549	-0.0215601	2.24662	0.0324091	0.65507	-3.9161
