# Supplementary material for: IL-1 modulation preserves biomolecular, structural and functional integrity of the somatosensory cortex after fetal inflammation
Source: Research Square preprint supplement (doi:10.21203/rs.3.rs-7882525/v1), 2025-11-07
Supplement: Supplementary file 3 [file 58b678c053ca7474cb7811b2.pdf]

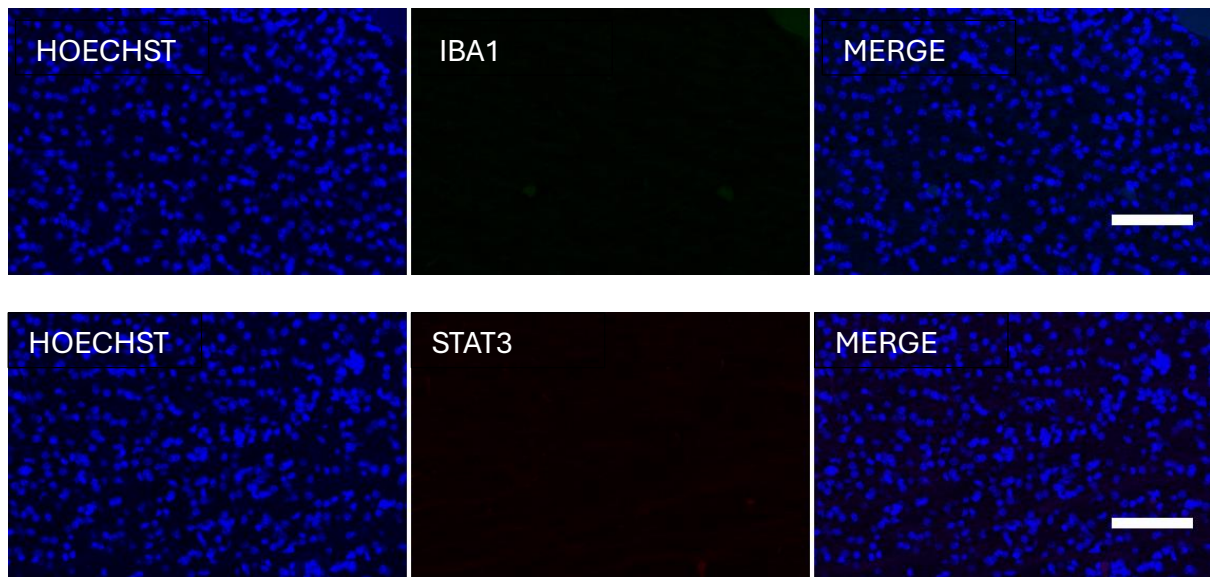

**Supplementary Figure 2. Negative controls that did not contain the primary antibody were included to confirm the absence of non-specific staining.** Representative photomicrographs of the lateral cortex (LC) negative control sections, which had omitted the target antibodies: ionised calcium binding adaptor molecule 1 (IBA1), and Signal transducer and activator of transcription 3 (STAT3). Left panel shows immunofluorescent staining of the nuclear stain HOECHST (showing cell nuclei, blue). Middle panel shows sections without the target antibody did not display non-specific staining. Right panel shows the merged image. Scale bar = 100  $\mu$ m.
