# Supplementary material for: IL-1 modulation preserves biomolecular, structural and functional integrity of the somatosensory cortex after fetal inflammation
Source: Research Square preprint supplement (doi:10.21203/rs.3.rs-7882525/v1), 2025-11-07
Supplement: Supplementary file 3 [file c74d60d19a137ec9078d2758.xlsx]

## Sheet: Sheet1
Supplementary Table 3. Intersected genes of the differential gene expression analysis between LPS + Vehicle vs Control and LPS + IL-1Ra vs LPS + Vehicle.
Gene	log2FC	AveExpr	t	P.Value	adj.P.Val	B
SLC17A7	-0.986987	1.66134	-4.52449	9.40349e-05	0.335742	-0.312344
GPNMB	-1.2654	0.783174	-3.60073	0.00116302	0.427568	-2.28373
CPXM2	-1.86949	-0.65194	-3.59016	0.00119608	0.427568	-3.19867
C5orf34	-1.18885	0.754306	-3.39192	0.00201453	0.515027	-2.56316
STAR	1.10887	1.32886	3.38543	0.0020489	0.515027	-2.18199
MFSD14A	1.87121	-0.389943	3.14735	0.00378251	0.571651	-3.36689
PNPLA3	-1.45999	0.419254	-3.11999	0.00405454	0.571651	-3.10636
ENSOARG00020040904	1.83085	-0.379331	3.05186	0.00481553	0.571651	-3.41431
IGF1R	1.21786	0.820698	2.96318	0.00601094	0.619817	-2.96575
CLIC2	0.8222	1.16465	2.93416	0.00645968	0.619817	-2.80554
PPP1R42	-0.808171	3.14127	-2.90039	0.00702184	0.619817	-2.38449
ubiquitin D	1.07078	2.01215	2.84016	0.00814088	0.619817	-2.65549
H1-6	1.04741	1.79334	2.75257	0.0100708	0.619817	-2.84366
TRIM55	-2.03553	-0.897665	-2.68138	0.0119467	0.619817	-3.80703
WDFY4	-1.08482	0.0277869	-2.68025	0.0119791	0.619817	-3.56805
ENSOARG00020031121	0.849844	0.49231	2.65589	0.0126945	0.619817	-3.39025
TRH	-1.33671	0.110499	-2.62315	0.0137186	0.619817	-3.65605
IL27	-0.871846	1.17922	-2.59645	0.0146097	0.619817	-3.27656
PLA2G4A	-0.689351	2.41608	-2.57891	0.0152244	0.619817	-3.00927
serpin B6	0.834927	1.78757	2.57266	0.0154491	0.619817	-3.08181
CHTF18	-1.29169	-0.225735	-2.56428	0.015755	0.619817	-3.75906
CTXN3	-0.81682	3.30574	-2.56048	0.0158957	0.619817	-2.98577
ENSOARG00020032393	-1.68386	-0.260131	-2.55184	0.0162199	0.619817	-3.78057
APOC2	0.854794	0.353125	2.50349	0.0181488	0.619817	-3.54174
DEPTOR	1.01659	0.794172	2.46118	0.0200082	0.619817	-3.49585
NME9	1.69897	-0.149036	2.39672	0.0231787	0.619817	-3.79913
GYG2	0.760297	0.871358	2.38811	0.0236351	0.619817	-3.54991
REL	-1.16907	0.110899	-2.37919	0.0241166	0.619817	-3.82649
COX4I2	0.941046	0.333608	2.34469	0.0260651	0.624361	-3.69734
RABEP2	-0.609828	1.8062	-2.34145	0.0262554	0.624361	-3.44594
ESR2	0.876731	1.42557	2.33428	0.0266804	0.624361	-3.49229
NRG4	-0.869297	1.53396	-2.33232	0.0267976	0.624361	-3.5037
SPPL2B	-0.983416	1.15659	-2.29759	0.0289561	0.640358	-3.6204
C13H20orf96	0.843358	-0.255306	2.27427	0.0304923	0.650384	-3.89656
GIMAP8	-1.284	1.7274	-2.26763	0.0309432	0.65507	-3.56996
WWP1	-0.927143	0.643694	-2.24861	0.032268	0.65507	-3.81394
OSBPL3	-0.581957	3.14779	-2.2474	0.0323535	0.65507	-3.51159
SPATS1	0.676352	1.78747	2.2386	0.0329854	0.659455	-3.55376
ZSCAN2	0.984121	1.67865	2.23192	0.0334718	0.664531	-3.58609
FBLN2	-0.851995	1.23983	-2.20846	0.035233	0.66561	-3.71397
CHRNE	-1.50156	-0.724854	-2.19898	0.0359675	0.66561	-4.09137
KIF16B	0.607577	2.00807	2.18777	0.036854	0.66561	-3.60956
IGF-I	0.910417	0.646388	2.18034	0.0374529	0.66561	-3.79823
NEMP1	1.19823	-0.199142	2.16511	0.0387067	0.675038	-3.97222
HTR2B	-1.13877	0.509971	-2.15525	0.0395386	0.675256	-3.89485
TRIM47	0.669025	1.80796	2.13731	0.0410926	0.677866	-3.68255
ENSOARG00020037506	0.734048	1.17907	2.12918	0.0418145	0.678808	-3.74035
H1-5	1.06487	-0.253076	2.12191	0.0424694	0.678808	-4.01151
ENSOARG00020038936	-0.741159	1.3119	-2.11415	0.0431794	0.678808	-3.79619
COL13A1	-0.749896	1.83873	-2.10928	0.0436304	0.678808	-3.74498
EEF1AKMT3	1.0047	-0.494297	2.09336	0.0451318	0.678808	-4.06207
ENSOARG00020037822	0.82071	0.269525	2.09225	0.0452389	0.678808	-3.94449
GVIN1	0.857124	2.17773	2.08777	0.0456708	0.678808	-3.74008
ENSOARG00020036053	0.954457	0.748275	2.08007	0.0464211	0.678808	-3.88231
PLA2G5	-1.38777	0.302912	-2.06441	0.0479826	0.68323	-4.02635
ENSOARG00020037194	-1.35099	-0.705242	-2.04639	0.0498357	0.688768	-4.18209
