# Supplementary material for: IL-1 modulation preserves biomolecular, structural and functional integrity of the somatosensory cortex after fetal inflammation
Source: Research Square preprint supplement (doi:10.21203/rs.3.rs-7882525/v1), 2025-11-07
Supplement: Supplementary file 5 [file c8c779f61ea214fbfb548902.pdf]

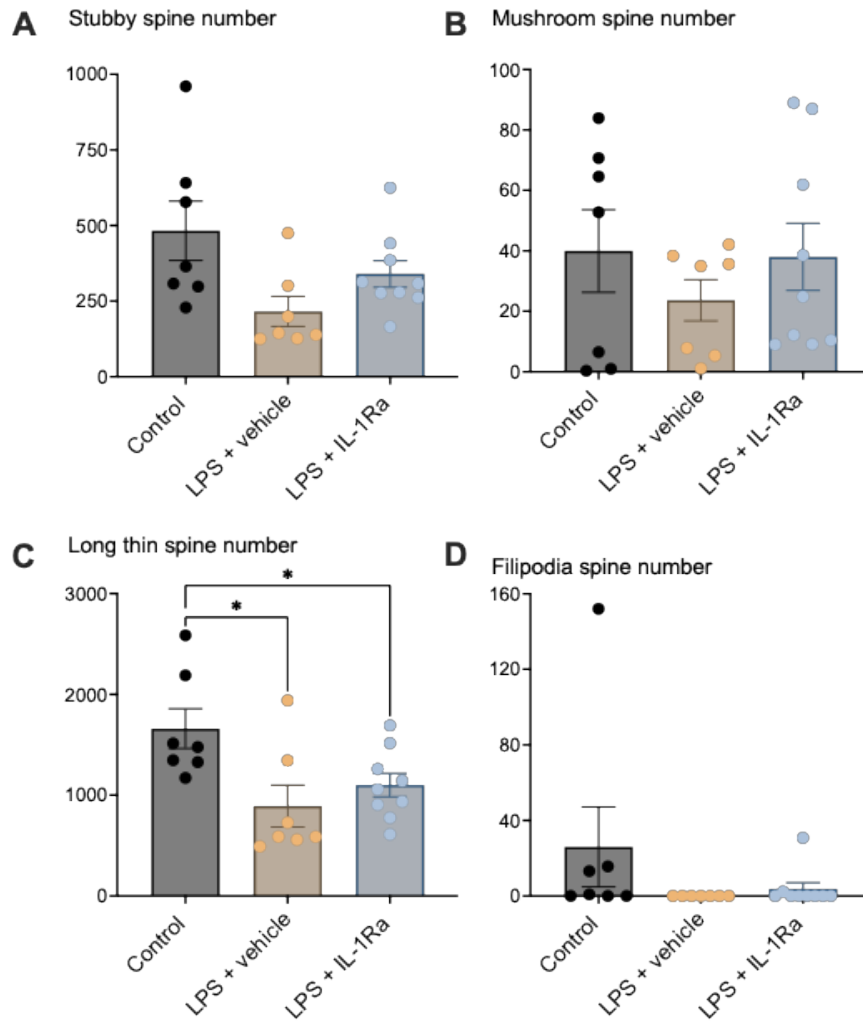

**Supplementary Figure 6. Dendritic Spine Morphology.** Numbers of stubby (A), mushroom (B), long thin (C) and filipodia (D) spines in the control (black,  $n = 7$ ; two subjects had limited Golgi penetration), LPS + vehicle (orange,  $n = 7$ ; 1 subject had limited Golgi penetration), and LPS + IL-1Ra (blue,  $n = 9$ ) groups. Data are means  $\pm$  SE,  $*P < 0.05$  vs control.
