# Supplementary material for: IL-1 modulation preserves biomolecular, structural and functional integrity of the somatosensory cortex after fetal inflammation
Source: Research Square preprint supplement (doi:10.21203/rs.3.rs-7882525/v1), 2025-11-07
Supplement: Supplementary file 6 [file cf79b95ea5960ce383892bc5.pdf]

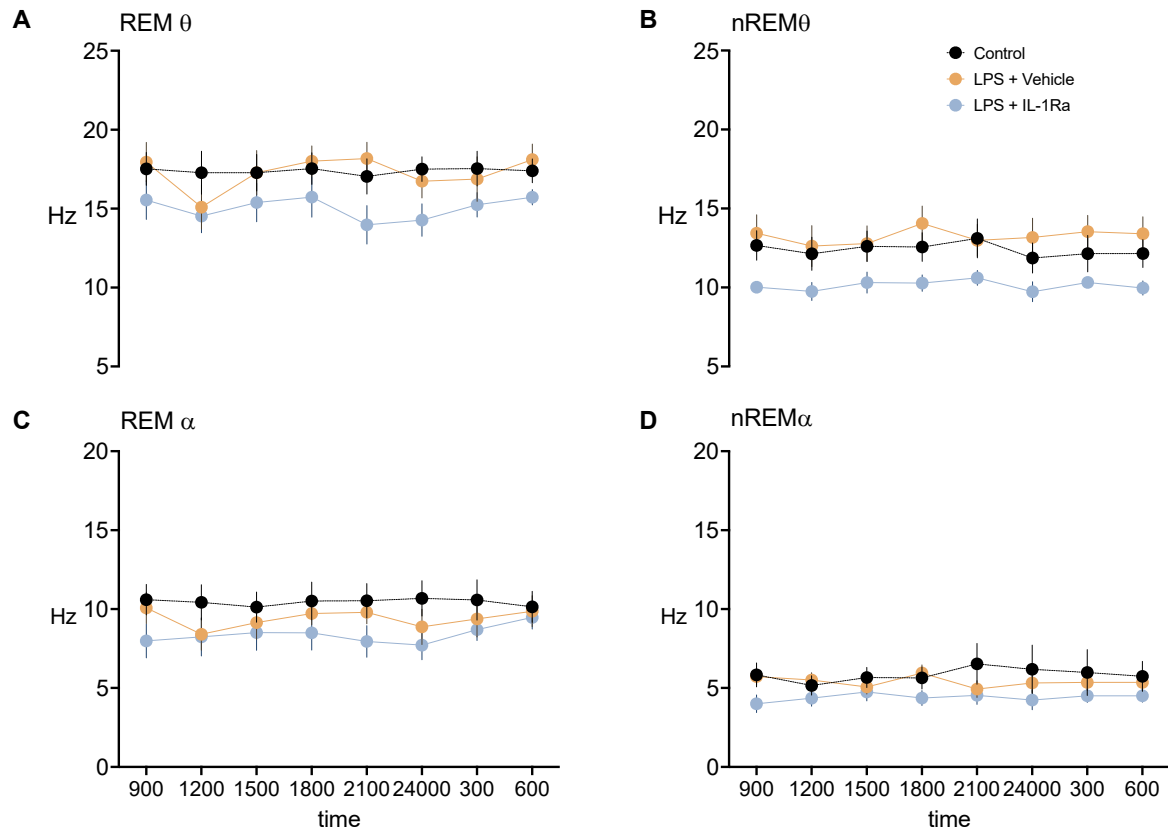

**Supplementary Figure 4.** Changes in nREM and REM cycling over eight epochs during the last 24 hours of the experimental recordings. Data are the %changes in theta frequency during rapid eye movement (REM) phase (A), % changes in theta during the non REM (nREM) phase (B), % changes in alpha frequency in the REM phase (C), and % changes in alpha frequency during the nREM phase (D), in the control (black,  $n = 9$ ), LPS (orange,  $n = 8$ ), and LPS + IL-1Ra (blue,  $n = 9$ ) groups. Data are hourly means  $\pm$  standard error (SE). \* $P < 0.05$  vs. control.
